# Supplementary material for: EEG education in Brazil: a national survey of adult neurology residents
Source: PubMed Central journal article supplement (PMC9651503; doi:10.1590/0004-282x-anp-2021-0150), 2021-11-30
Supplement: 1678-4227-anp-80-01-043-s2.pdf [file 1678-4227-anp-80-01-043-s2.pdf]

**Supplementary File 2.** Classification of hospitals affiliated with participating residency programs based on location, level of care, ownership status, and size.

| Location            | Level of care | Ownership status    | Size   |
|---------------------|---------------|---------------------|--------|
| Alagoas             | Tertiary      | Public              | Large  |
| Bahia               | Tertiary      | Private and charity | Large  |
| Bahia               | Tertiary      | Private and charity | Large  |
| Ceará               | Tertiary      | Public              | Large  |
| Ceará               | Tertiary      | Public              | Large  |
| Goiás               | Tertiary      | Public              | Large  |
| Goiás               | Tertiary      | Public              | Large  |
| Goiás               | Tertiary      | Private and charity | Large  |
| Mato Grosso         | Tertiary      | Public              | Large  |
| Minas Gerais        | Tertiary      | Public              | Large  |
| Minas Gerais        | Tertiary      | Public              | Large  |
| Minas Gerais        | Tertiary      | Public              | Large  |
| Minas Gerais        | Tertiary      | Private and charity | Large  |
| Paraná              | Tertiary      | Public              | Large  |
| Paraná              | Tertiary      | Private             | Large  |
| Paraná              | Tertiary      | Private and charity | Large  |
| Paraná              | Tertiary      | Private             | Medium |
| Paraná              | Tertiary      | Private and charity | Large  |
| Paraná              | Tertiary      | Private and charity | Large  |
| Paraná              | Tertiary      | Public              | Large  |
| Paraná              | Tertiary      | Private and charity | Large  |
| Paraná              | Tertiary      | Private and charity | Large  |
| Paraná              | Tertiary      | Public              | Large  |
| Pernambuco          | Tertiary      | Public              | Large  |
| Pernambuco          | Tertiary      | Public              | Large  |
| Pernambuco          | Tertiary      | Public              | Large  |
| Piauí               | Tertiary      | Public              | Large  |
| Rio de Janeiro      | Tertiary      | Public              | Large  |
| Rio de Janeiro      | Tertiary      | Public              | Large  |
| Rio Grande do Norte | Tertiary      | Public              | Large  |
| Rio Grande do Sul   | Tertiary      | Charity             | Large  |
| Rio Grande do Sul   | Tertiary      | Private             | Large  |
| Rio Grande do Sul   | Tertiary      | Public              | Large  |
| Rio Grande do Sul   | Tertiary      | Private and charity | Large  |
| Rio Grande do Sul   | Tertiary      | Public              | Large  |
| Rio Grande do Sul   | Tertiary      | Public              | Large  |
| Santa Catarina      | Tertiary      | Private and charity | Large  |
| São Paulo           | Tertiary      | Public              | Large  |
| São Paulo           | Tertiary      | Private and charity | Large  |
| São Paulo           | Tertiary      | Public              | Large  |
| São Paulo           | Tertiary      | Public              | Large  |
| São Paulo           | Tertiary      | Public              | Large  |

Supplementary File 2. Cont.

| Location  | Level of care | Ownership status    | Size  |
|-----------|---------------|---------------------|-------|
| São Paulo | Tertiary      | Public              | Large |
| São Paulo | Tertiary      | Public              | Large |
| São Paulo | Tertiary      | Private and charity | Large |
| São Paulo | Tertiary      | Private and charity | Large |
| São Paulo | Tertiary      | Public              | Large |
| São Paulo | Tertiary      | Private and charity | Large |
| São Paulo | Tertiary      | Public              | Large |
| São Paulo | Tertiary      | Private and charity | Large |
| São Paulo | Secondary     | Private             | Small |
| São Paulo | Tertiary      | Private and charity | Large |
